# Supplementary material
Source: PubMed Central journal article supplement (PMC5896744)
Supplement: NIHMS955517-supplement-Supplemental.pdf [file NIHMS955517-supplement-Supplemental.pdf]

|                       |     |                                                                                 |     |
|-----------------------|-----|---------------------------------------------------------------------------------|-----|
| PKA RI $\alpha$ CNB-A | 115 | - - - - R K V I P K D Y K T M A A L A K A I E K N V                             | 136 |
| PKG I $\beta$ CNB-A   | 92  | S H V T L P F Y P K S P Q S K D L I K E A I L D N D                             | 117 |
| PKA RI $\alpha$ CNB-B | 234 | - - - - - I L M G S T L R K R K M Y E E F L S K V S                             | 254 |
| PKG I $\beta$ CNB-B   | 219 | - - - - - - - - - T G L I K H T E Y M E F L K S V P                             | 235 |
| PKA RI $\alpha$ CNB-A | 137 | L F S H <b>L</b> D D N E R S D I F <b>D</b> A M F S V S F I A G E               | 162 |
| PKG I $\beta$ CNB-A   | 118 | F M K N <b>L</b> E L S Q I Q E I V <b>D</b> C M Y P V E Y G K D S               | 143 |
| PKA RI $\alpha$ CNB-B | 255 | I L E S <b>L</b> D K W E R L T V A <b>D</b> A L E P V Q F E D G Q               | 280 |
| PKG I $\beta$ CNB-B   | 236 | T F Q S <b>L</b> P E E I L S K L A <b>D</b> V L E E T H Y E N G E               | 261 |
| PKA RI $\alpha$ CNB-A | 163 | T V I Q Q <b>G</b> D E <b>G</b> D N F Y V I D Q <b>G</b> E T D <b>V</b> Y V N - | 187 |
| PKG I $\beta$ CNB-A   | 144 | C I I K E <b>G</b> D V <b>G</b> S L V Y V M E D <b>G</b> K V E <b>V</b> T K E - | 168 |
| PKA RI $\alpha$ CNB-B | 281 | K I V V Q <b>G</b> E P <b>G</b> D E F F I I L E <b>G</b> S A A <b>V</b> L Q R R | 306 |
| PKG I $\beta$ CNB-B   | 262 | Y I I R Q <b>G</b> A R <b>G</b> D T F F I I S K <b>G</b> T V N <b>V</b> T R E D | 287 |
| PKA RI $\alpha$ CNB-A | 188 | - - - - - N E W <b>A T</b> S V <b>G</b> E G G S <b>F G E L A L I Y G</b>        | 208 |
| PKG I $\beta$ CNB-A   | 169 | - - - - - G V K <b>L C</b> T M <b>G</b> P G K V <b>F G E L A I L Y N</b>        | 189 |
| PKA RI $\alpha$ CNB-B | 307 | S E N E E F V E <b>V G</b> R L <b>G</b> P S D Y <b>F G E I A L L M N</b>        | 332 |
| PKG I $\beta$ CNB-B   | 288 | S P S E D P V F <b>L R</b> T L <b>G</b> K G D W <b>F G E K A L Q G E</b>        | 313 |
| PKA RI $\alpha$ CNB-A | 209 | <b>T P R A A T V</b> K A K T N V K L W G I <b>D R</b> D S Y R R I               | 234 |
| PKG I $\beta$ CNB-A   | 190 | <b>C T R T A T V</b> K T L V N V K L W A I <b>D R</b> Q C F Q T I               | 215 |
| PKA RI $\alpha$ CNB-B | 333 | <b>R P R A A T V</b> V A R G P L K C V K L <b>D R</b> P R F E R V               | 358 |
| PKG I $\beta$ CNB-B   | 314 | <b>D V R T A N V</b> I A A E A V T C L V I <b>D R</b> D S F K H L               | 339 |
| PKA RI $\alpha$ CNB-A | 235 | L M G S T L R K R K M Y E E F L S K V S I L E S L D                             | 260 |
| PKG I $\beta$ CNB-A   | 216 | M M R T G L I K H T E Y - - - - - - - - - - -                                   | 227 |
| PKA RI $\alpha$ CNB-B | 359 | L G P C S D I L K R N I Q Q <b>Y</b> N S F V S L S V - - -                      | 381 |
| PKG I $\beta$ CNB-B   | 340 | I G G L D D V S N K A <b>Y</b> E D A E A K A K Y E A E A A                      | 365 |
| PKA RI $\alpha$ CNB-A | 261 | K <b>W</b> E R L T V A D A L E P V                                              | 274 |
| PKG I $\beta$ CNB-A   |     | - - - - - - - - - - - - - - - - -                                               |     |
| PKA RI $\alpha$ CNB-B |     | - - - - - - - - - - - - - - - - -                                               |     |
| 1 PKG I $\beta$ CNB-B | 366 | F F A N - - - - - - - - - - -                                                   | 369 |

2 **S1 Fig. Sequence alignment of CNB domain constructs used in this study.** Amino  
3 sequences of the CNB domains of the human isoforms of PKA RI $\alpha$  and PKG I $\beta$  were aligned  
4 using Clustal Omega (54,55). Identical residues are shown in yellow. The three cGMP-specific  
5 sites of the PKG I $\beta$  CNB-B and the corresponding residues of PKA RI $\alpha$  are marked in red.  
6 Capping residues are shown in blue.

7

8

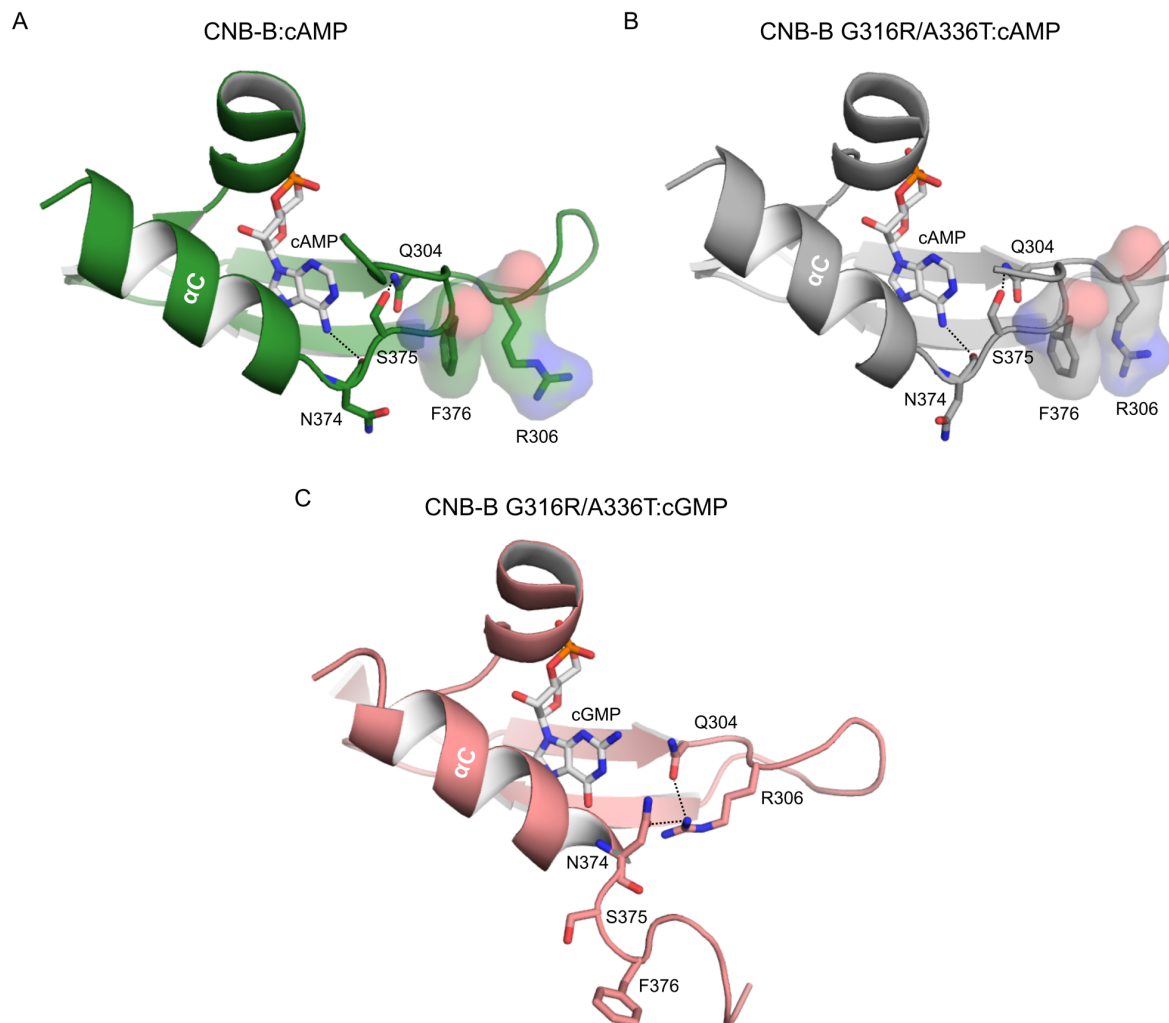

9

10 **S2 Fig. Interaction networks of the CNB-B double mutant.** (A) In the co-crystal structure of  
 11 the wild type CNB-B:cAMP, the C-terminal loop interacts with PBC and the  $\beta$ 4- $\beta$ 5 loop thus  
 12 blocking the binding pocket. In particular, the backbone carbonyl of N374 interacts with the N6  
 13 amino group of the adenine ring, while S375 hydrogen bonds Q304. F376 interacts with R306  
 14 through a hydrophobic interaction. (B) The co-crystal structure of the CNB-B  
 15 G316R/A336T:cAMP shows the same conformation of the C-terminal loop as in the wild type  
 16 CNB-B. (C) In the co-crystal structure of the CNB-B G316R/A336T:cGMP, N374 no longer  
 17 interacts with the guanine moiety, but forms a hydrogen bond with R306. The side chain of the  
 18 R306 additionally interacts with Q304. These changes in interactions displace the C-terminal  
 19 loop from the binding pocket.

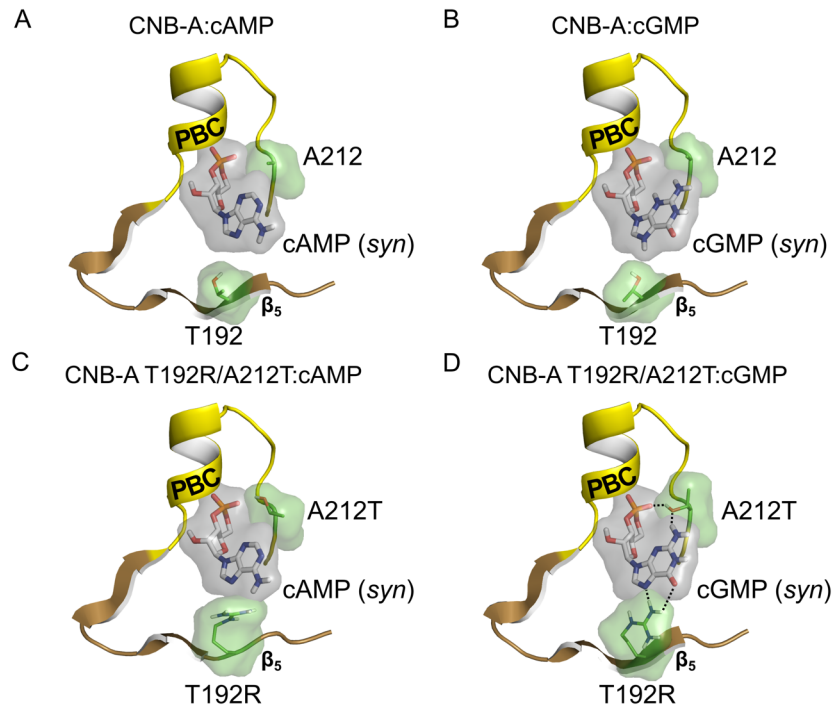

20

21 **S3 Fig. Structural model of PKA R1α CNB-A wild type and T192/A212T double mutant.** The

22 structural models (B-D) were generated with YASARA (40) using the structure of the bovine PKA

23 R1α as a template (PDB code 1RGS) (32). Residues 115-274 of human PKA R1α analogous to

24 114-273 in bovine PKA R1α. (A) a model of PKA R1α CNB-A binding pocket bound with cAMP

25 (B) a model of PKA R1α CNB-A Binding pocket bound with cGMP. (C) a model of PKA R1α CNB-

26 A double mutant T192R/A212T binding pocket bound with cAMP. Introducing an arginine

27 residue (T192R) at β5 leads to a steric clash with the position 6 amine of cAMP. (D) a model of

28 PKA R1α CNB-A double mutant T192R/A212T bound with cGMP bound. Both cGMP selective

29 contact residues, T192R and A212T, form specific hydrogen bonds with cGMP. Residues 192

30 and 212 are shown as green sticks with transparent surface. cAMP and cGMP are colored by

31 atom type with a transparent surface.

35

36

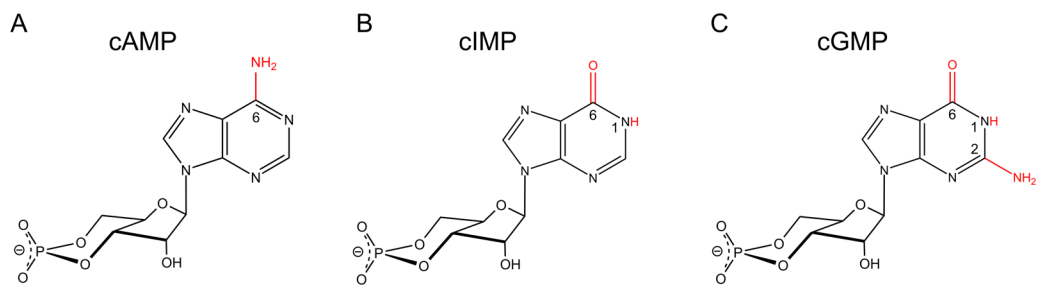

37 **S4 Fig. 2D projection of cAMP, cIMP and cGMP.** The purine nucleotides differ in their  
38 nucleobase. Differences between cAMP (A), cIMP (B) and cGMP (C) are marked in red.

39
